# Supplementary material
Source: Springer Nature journal article supplement (https://www.springermedizin.de/resource/supplementary/12958_2007_418_MOESM1_ESM.pdf/9567836)

■ High-affinity entry sites

■ Medium-affinity entry sites

■ Low-affinity entry sites

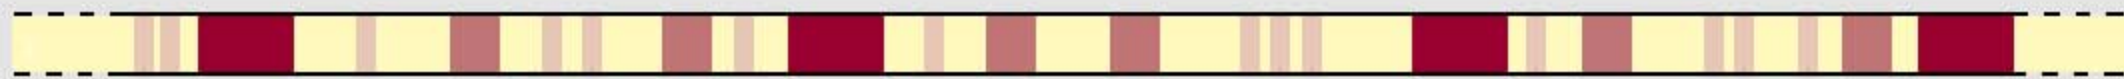

A

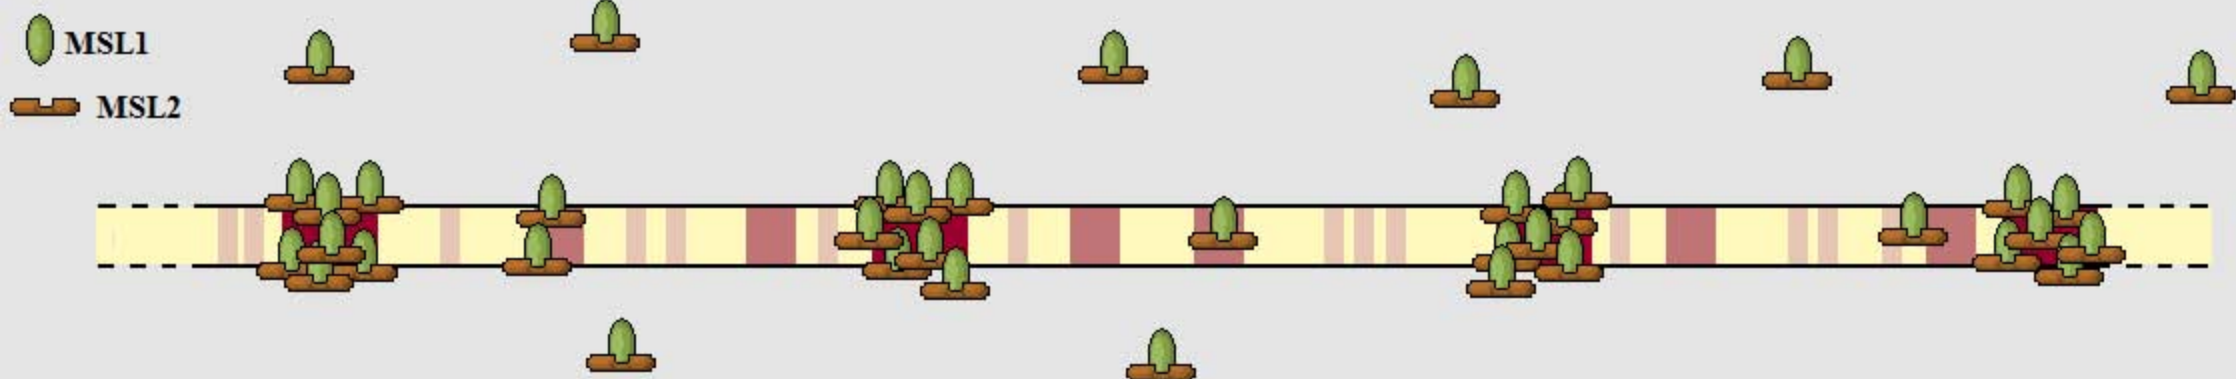

B1

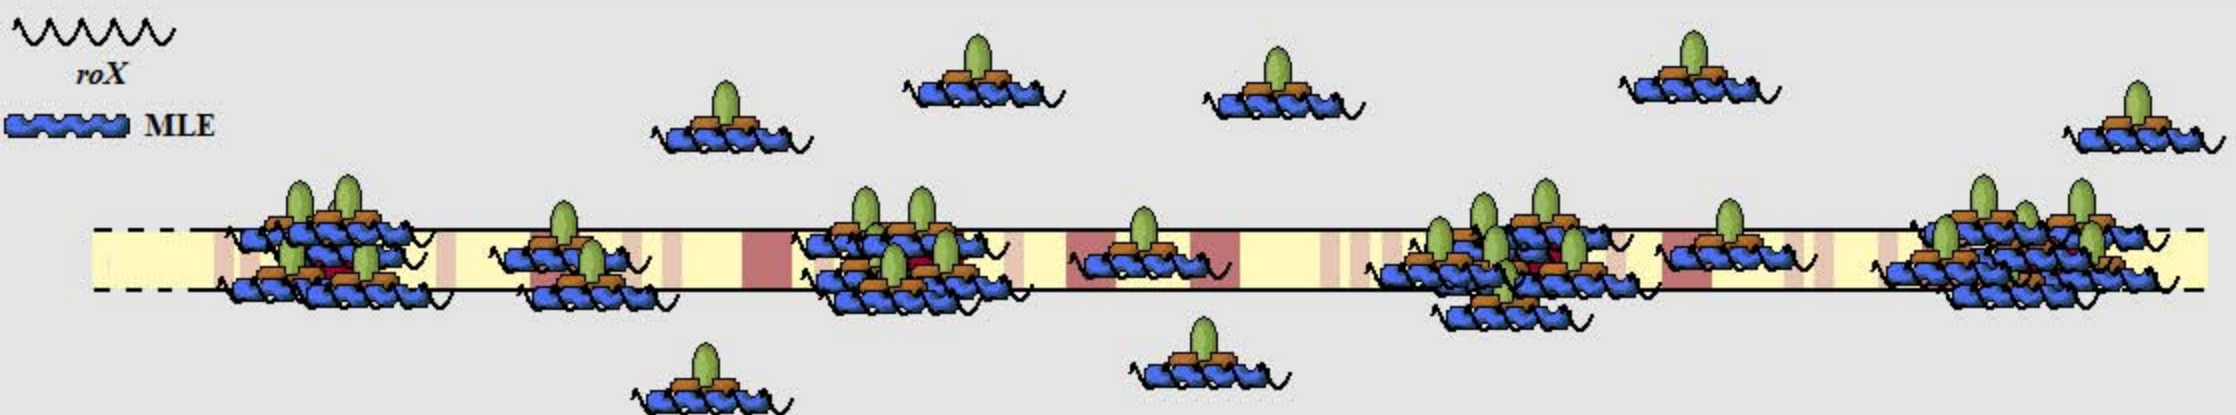

B2

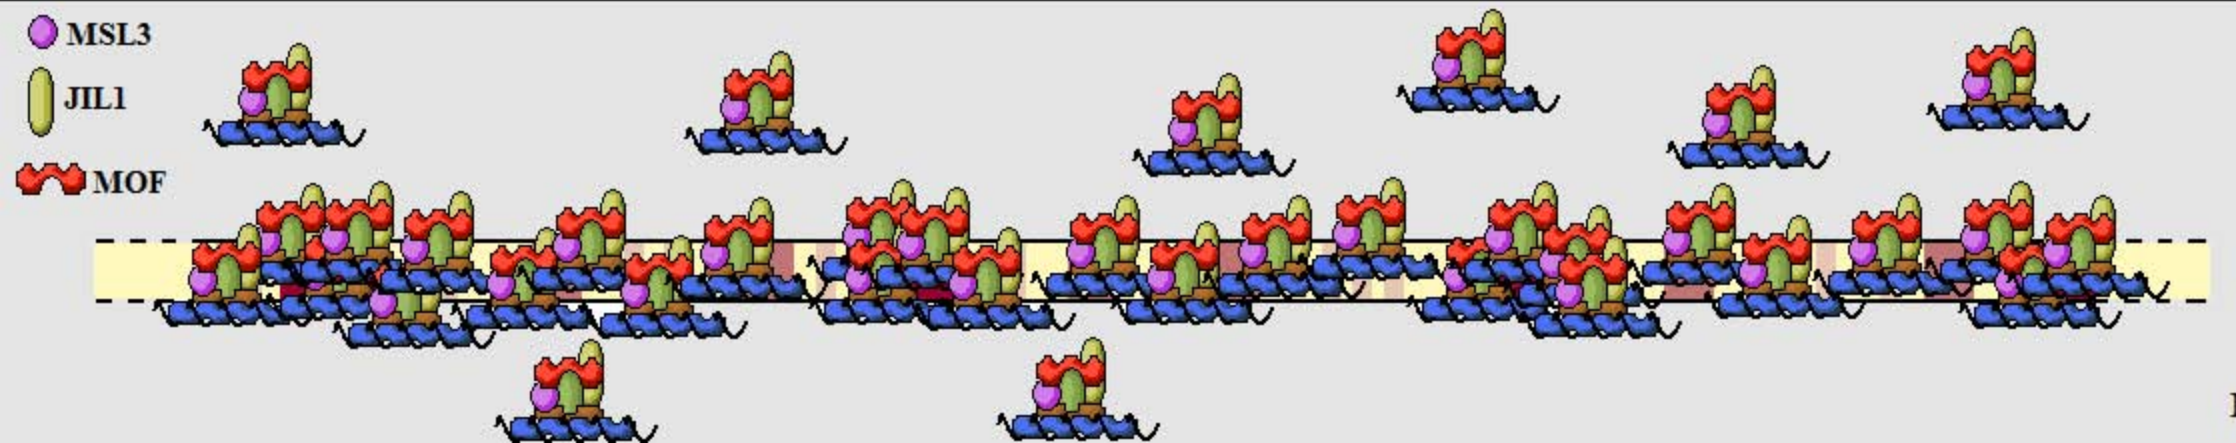

B3

Supplement: MOESM1 [file 9567836]
